# Supplementary material
Source: Springer Nature journal article supplement (https://www.springermedizin.de/resource/supplementary/12888_2003_49_MOESM1_ESM.pdf/9481692)

*Fear, anxiety*

*Avoidance of  
dental care*

*Deterioration  
of  
dentition*

*Feelings of guilt, shame  
and inferiority*

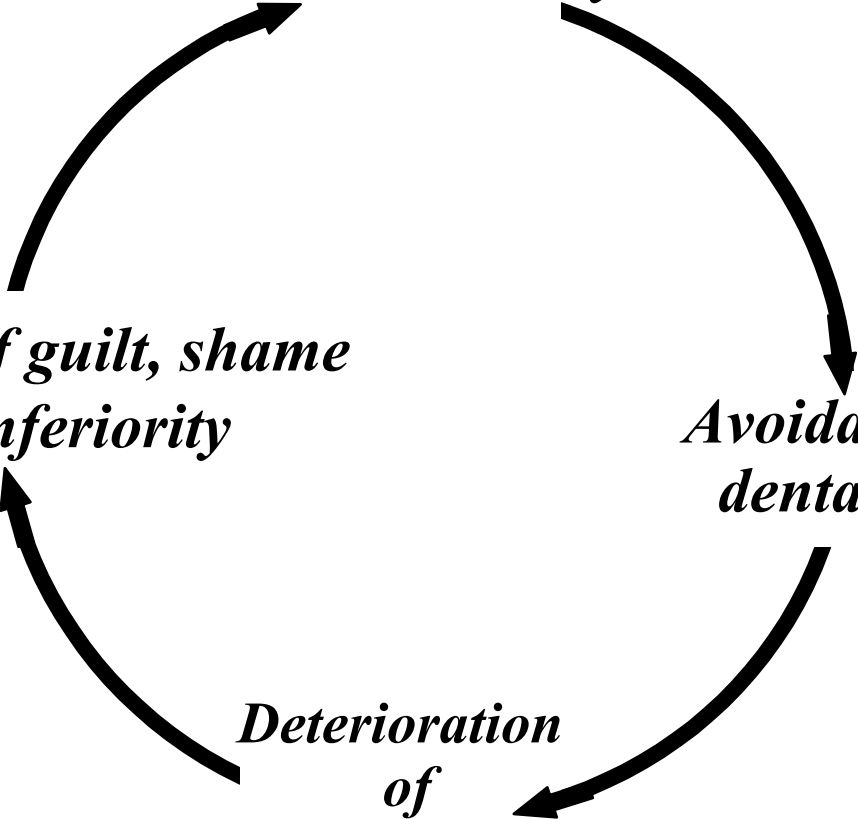

Supplement: MOESM1 [file 9481692]
